# Supplementary material for: Anticholinergic Drugs Interact With Neuroprotective Chaperone L-PGDS and Modulate Cytotoxicity of Aβ Amyloids
Source: PubMed Central journal article supplement (PMC7300299; doi:10.3389/fphar.2020.00862), 2020-06-11
Supplement: Image_2.pdf [file Image_2.pdf]

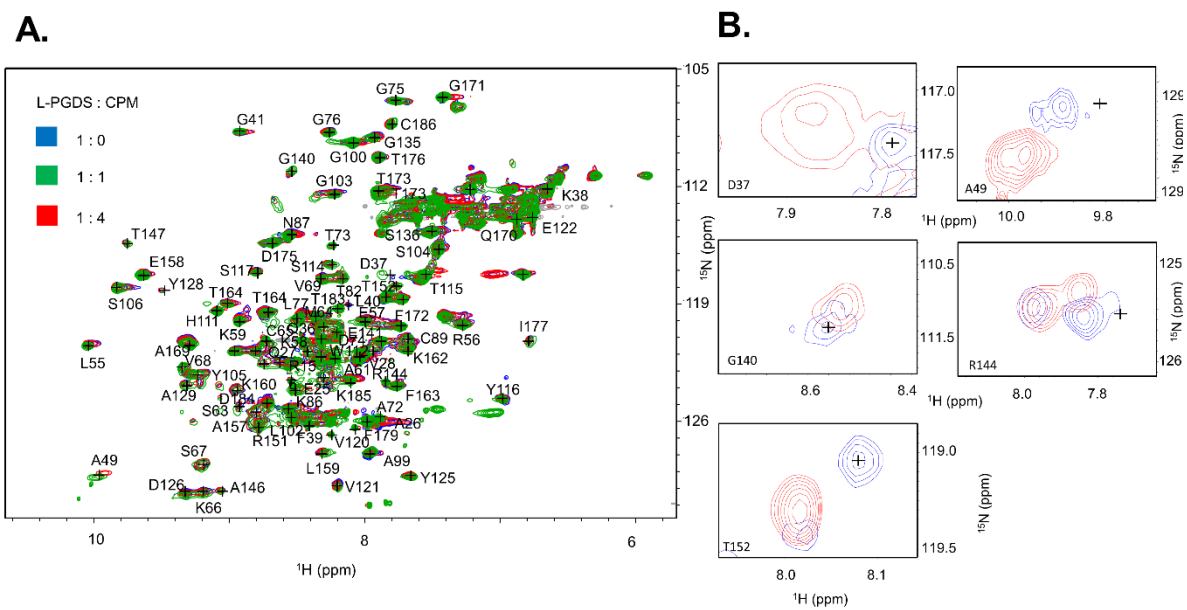

Figure S2: NMR titration of  $^{15}\text{N}$ -labeled L-PGDS with unlabelled CPM. (A) Superposition of 2D-HSQC spectra of  $^{15}\text{N}$ -labeled L-PGDS alone (blue), upon addition of CPM (blue) at a molar ratio of 1:1 and upon addition of CPM (red) at a molar ratio of 1:4 (B) Resonances undergoing significant chemical shift perturbations in the 1:4 titration step have been highlighted.
