# Supplementary material for: Anticholinergic Drugs Interact With Neuroprotective Chaperone L-PGDS and Modulate Cytotoxicity of Aβ Amyloids
Source: PubMed Central journal article supplement (PMC7300299; doi:10.3389/fphar.2020.00862), 2020-06-11
Supplement: Image_4.pdf [file Image_4.pdf]

**A.**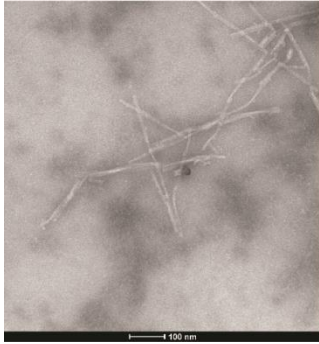**B.**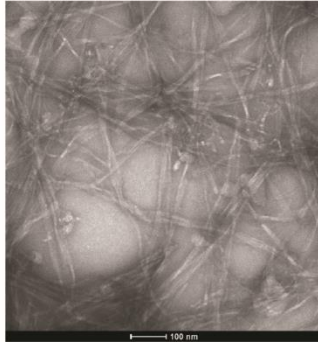**C.**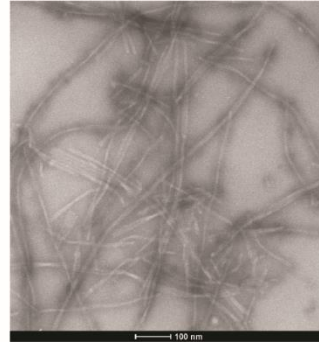

Figure S4: Direct interaction of drugs between CPM and TRD with A $\beta$ (1-40) peptides in a 1:1 ratio. (A) TEM image of A $\beta$ (1-40) peptide control grown for 60 h at 37°C under continuous shaking (B) TEM image of A $\beta$ (1-40) control grown in the presence of CPM (1:1 ratio) for 60 h at 37°C under continuous shaking. (C) TEM image of A $\beta$ (1-40) control grown in the presence of TRD (1:1 ratio) for 60 h at 37°C under continuous shaking.
